# Supplementary material
Source: PubMed Central journal article supplement (PMC153630)

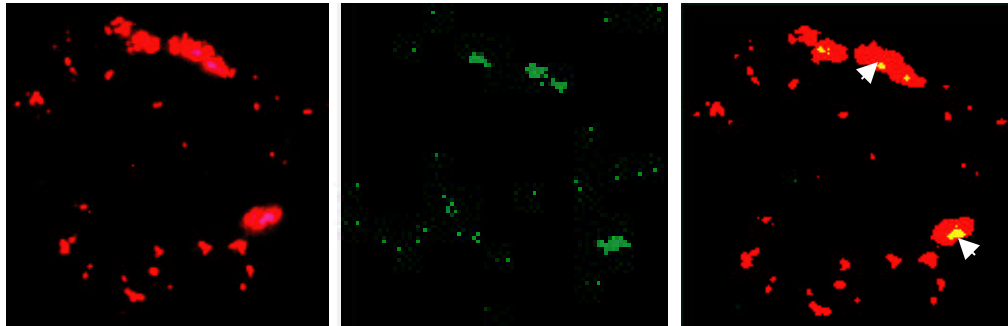

Supplement: pnas_0730882100_3.pdf [file pnas_0730882100_3.pdf]
